# Supplementary material for: Forecasting the prevalence of overweight and obesity in India to 2040
Source: PLoS One. 2020 Feb 24;15(2):e0229438. doi: 10.1371/journal.pone.0229438 (PMC7039458; doi:10.1371/journal.pone.0229438)
Supplement: S2 File — This file contains prevalence of overweight and obesity estimated in the data sets, forecasts by five-year age groups, a table comparing results of forecasting studies in India, and forecasts of overweight and obesity using South Asian BMI cut-offs. (XLSX) [file pone.0229438.s002.xlsx]

## Sheet: Percentage prevalence Women
	SAGE 0 (2002-04)			SAGE 0 (2002-04)			SAGE 1 (2007-10)			SAGE 1 (2007-10)
Age	Overweight			Obese			Overweight			Obese
50-54	13.8002	9.05606	20.4701	2.20178	1.04822	4.56622	19.6943	14.5012	26.1777	3.83604	2.5528	5.72644
55-59	10.4153	5.80873	17.9778	3.19043	0.995255	9.75052	13.3363	9.916	17.7046	3.73741	2.38038	5.82194
60-64	10.2075	5.55342	18.0178	4.24206	1.4911	11.477	12.8957	9.40528	17.4322	2.90606	1.67156	5.00585
65-69	7.76465	3.12947	17.9902	4.80698	1.31357	16.0775	10.2245	7.24683	14.2378	4.50548	2.55373	7.82906
	Rural
	Overweight	NFHS 3 (2005-06)		Obese	NFHS 3 (2005-06)		Overweight	NFHS 4 (2015-16)		Obese	NFHS 4 (2015-16)
20-24	3.03283	2.29769	3.99357	0.383036	0.224051	0.654094	6.35352	5.17936	7.77204	1.32292	0.972966	1.79645
25-29	5.2304	3.88928	7.00028	0.81968	0.546694	1.2273	11.3782	9.56628	13.482	2.36283	1.80485	3.0879
30-34	7.33359	5.57603	9.58888	1.44488	0.920516	2.26112	15.4244	13.2917	17.829	3.82755	2.90188	5.0332
35-39	9.7352	7.45283	12.6212	1.9486	1.19377	3.16543	17.3608	15.1934	19.7652	4.80199	3.72344	6.17291
40-44	10.9361	8.63249	13.7619	2.75249	1.73643	4.33684	18.6106	16.2781	21.1927	5.27221	4.27531	6.48582
45-49	12.4749	9.85224	15.6743	3.23169	2.01426	5.14632	19.9887	17.3411	22.9284	5.57882	4.36794	7.10046
	Urban
	Overweight	NFHS 3 (2005-06)		Obese	NFHS 3 (2005-06)		Overweight	NFHS 4 (2015-16)		Obese	NFHS 4 (2015-16)
20-24	8.93271	7.35804	10.8051	1.86326	1.34545	2.57514	11.7025	10.2922	13.2775	3.25631	2.62139	4.03862
25-29	15.9232	14.1402	17.8841	4.2485	3.46519	5.19934	20.5029	18.9714	22.1243	6.58231	5.54346	7.79978
30-34	22.3202	19.6891	25.1926	6.792	5.49812	8.36342	27.4048	25.5429	29.3489	10.5732	9.41337	11.8573
35-39	25.312	24.1185	26.5439	9.87377	8.40086	11.5723	29.6803	28.3808	31.0136	13.2847	11.8065	14.9166
40-44	28.4132	26.5754	30.3256	13.4681	10.8169	16.6479	33.4351	31.7964	35.1147	16.0624	14.4937	17.7657
45-49	29.4234	27.5138	31.4081	12.8406	10.9886	14.9524	34.0829	32.6695	35.5252	16.9198	14.8515	19.211

## Sheet: Percentage prevalence Men
	SAGE 0 (2002-04)			SAGE 0 (2002-04)			SAGE 1 (2007-10)			SAGE 1 (2007-10)
Age	Overweight			Obese			Overweight			Obese
50-54	7.74512	4.13473	14.0462	0.989668	0.291369	3.30603	11.5519	7.36495	17.6652	3.05181	1.68701	5.45945
55-59	17.7712	9.98538	29.6295	1.89765	0.497425	6.96357	9.63008	6.80877	13.4517	1.00981	0.432509	2.33958
60-64	8.1153	4.44812	14.3517	0.27775	0.067233	1.13991	6.4862	4.38257	9.49928	1.08606	0.534276	2.19514
65-69	3.74569	1.8862	7.30188	2.33415	0.415355	12.045	5.91081	3.32275	10.2999	0.894335	0.28769	2.74499
	Rural
	Overweight	NFHS 3 (2005-06)		Obese	NFHS 3 (2005-06)		Overweight	NFHS 4 (2015-16)		Obese	NFHS 4 (2015-16)
20-24	2.46736	1.9042	3.19165	0.377832	0.206548	0.690172	7.45075	5.86891	9.41627	0.978592	0.602317	1.58618
25-29	5.04261	3.57635	7.06595	0.406129	0.162585	1.01079	12.8216	10.4936	15.5762	1.93684	1.31027	2.85438
30-34	6.84852	5.00732	9.30046	0.793783	0.448774	1.4003	16.0303	13.2169	19.3092	2.22576	1.68277	2.93873
35-39	7.40253	5.64734	9.64745	1.06626	0.660989	1.71571	17.6557	14.869	20.8368	3.33827	2.35099	4.72012
40-44	7.85376	5.62023	10.8726	0.943376	0.591251	1.50204	17.9349	15.0861	21.1874	3.06804	2.17332	4.31484
45-49	8.48515	6.21224	11.4878	1.22155	0.762833	1.95069	17.7922	14.5436	21.5832	3.29018	2.46305	4.38258
	Urban
	Overweight	NFHS 3 (2005-06)		Obese	NFHS 3 (2005-06)		Overweight	NFHS 4 (2015-16)		Obese	NFHS 4 (2015-16)
20-24	6.85574	5.88663	7.97088	0.841187	0.537629	1.31388	13.8659	11.6309	16.4505	2.61141	1.76161	3.85507
25-29	12.5508	10.9176	14.3887	1.97766	1.41481	2.75816	20.9919	18.236	24.0418	4.08324	3.1215	5.325
30-34	17.0834	14.9759	19.4198	3.03709	2.27461	4.04457	25.8298	22.8184	29.0887	6.30005	3.98985	9.81119
35-39	21.1476	18.2676	24.3464	3.81299	2.85447	5.07656	30.5598	25.5163	36.1167	6.10938	4.79127	7.76056
40-44	21.7836	19.193	24.6174	4.31701	3.30174	5.62631	32.4476	29.0722	36.016	7.49799	6.53666	8.58771
45-49	22.9329	20.4248	25.6496	4.84168	3.46082	6.73505	33.5063	30.3275	36.8422	6.6746	4.90925	9.01457

## Sheet: Women Forecast Rural
Age	Year	Status	Proportion	Lower Bound	Upper Bound	Status	Proportion	Lower Bound	Upper Bound
20-24	2010	Overweight	4.83052	3.74	5.88208	Obese	0.92574	0.599226	1.22517
25-29			8.4734	6.72971	10.2372		1.68315	1.17675	2.1564
30-34			11.5145	9.43477	13.7027		2.82577	1.91496	3.64646
35-39			13.6438	11.3254	16.1839		3.5644	2.46163	4.66818
40-44			14.9812	12.4726	17.4518		4.20988	3.00876	5.41033
45-49			16.525	13.5977	19.3003		4.75303	3.1973	6.12057
50-54			14.6638	12.578	16.8201		3.02042	1.93962	3.97047
55-59			9.78208	8.21873	11.2866		2.6657	1.6537	3.70824
60-64			9.46782	7.80937	10.9986		1.73556	0.86649	2.64098
65-69			8.15996	6.13349	10.1846		3.45221	2.05424	4.77237
20-24	2020		8.39151	6.49708	10.2183		2.06233	1.33493	2.72938
25-29			12.7873	10.5827	15.077		3.30324	2.28226	4.28892
30-34			16.5641	13.6525	19.4682		4.42768	3.19134	5.57911
35-39			19.6383	16.4578	22.874		5.95674	4.48852	7.5874
40-44			21.6771	17.977	25.6514		7.3783	5.23217	9.61026
45-49			22.2634	17.8709	26.4307		7.79351	5.47158	10.1815
50-54			22.6341	17.8522	27.3557		7.71158	4.80184	10.1919
55-59			23.7043	18.5486	28.7811		7.48607	4.0234	10.7503
60-64			22.3556	18.0997	27.287		5.20791	2.34788	7.83043
65-69			18.722	14.9786	23.0803		3.70021	1.46933	6.12887
20-24	2030		10.6153	8.21881	12.9261		2.60885	1.68869	3.45267
25-29			14.7539	12.1683	17.4308		4.31257	2.94454	5.62484
30-34			18.5377	15.4231	21.7464		6.22433	4.52836	7.94646
35-39			21.8828	17.9973	25.942		8.28231	5.92971	10.3754
40-44			24.3634	19.6851	29.2779		9.74896	6.67007	12.4701
45-49			25.6054	20.9848	30.9402		10.8959	7.35007	14.1884
50-54			26.456	21.0566	32.4934		11.3013	6.92729	15.3054
55-59			27.1437	20.8531	33.8434		10.7299	6.21457	15.101
60-64			27.6464	21.5063	35.0995		9.65233	4.675	13.9728
65-69			28.2557	21.4335	35.1186		8.46002	3.03904	13.0784
20-24	2040		11.146	8.62975	13.5724		2.73929	1.77312	3.6253
25-29			15.8937	13.0609	18.7547		4.88539	3.31716	6.37689
30-34			19.7284	16.4509	23.1626		7.19947	5.18373	9.26573
35-39			22.9769	18.9844	27.1745		9.52348	6.90675	12.0161
40-44			25.4585	20.7598	30.5311		11.5627	8.09134	14.6084
45-49			26.8996	21.5783	32.8258		13.0403	8.70765	16.9311
50-54			28.0851	22.1486	34.9829		13.5319	8.36135	18.2558
55-59			29.2479	23.0625	36.9161		13.556	7.628	18.6652
60-64			30.277	23.5165	38.6411		12.7586	6.13372	18.3374
65-69			30.7564	23.3147	39.5223		11.1109	4.63794	16.8481

## Sheet: Women Forecast Urban 
Age	Year	Status	Proportion	Lower Bound	Upper Bound	Status	Proportion	Proportion	Proportion
20-24	2010	Overweight	10.3979	8.8268	12.0359	Obese	2.65215	1.98446	3.30627
25-29			18.3265	16.5585	19.9995		5.46607	4.50557	6.49823
30-34			24.9054	22.6173	27.2641		8.80603	7.45597	10.1028
35-39			27.5914	26.2593	28.7783		11.567	10.1046	13.2442
40-44			30.9973	29.1881	32.7185		14.8928	12.6563	17.2049
45-49			31.7677	30.0955	33.4659		15.0585	12.9297	17.079
50-54			33.5138	29.2682	38.4688		6.81538	4.49285	9.12361
55-59			22.4841	18.5427	26.3995		6.19665	4.28299	8.08168
60-64			21.6978	17.6407	25.7025		3.997	1.87781	6.20551
65-69			18.9057	14.7497	22.8732		7.74935	4.74828	10.9861
20-24	2020		14.3063	12.1446	16.56		4.21339	3.15266	5.25257
25-29			21.824	19.624	24.0615		6.86895	5.70799	8.0046
30-34			28.0889	25.6358	30.353		10.387	8.95576	12.0378
35-39			33.0594	30.2868	35.5017		14.7043	12.565	16.7964
40-44			35.7285	32.1248	39.2768		18.6485	15.1556	22.0979
45-49			36.3283	31.9519	41.0657		20.7521	16.1065	25.5201
50-54			35.9639	30.5283	42.0508		22.4736	15.9868	28.1855
55-59			34.8378	28.3437	41.8187		21.1568	13.2825	28.5002
60-64			33.7742	26.0085	41.9555		14.2298	5.30335	22.1301
65-69			28.2135	21.0619	35.9105		9.76707	3.54181	16.6025
20-24	2030		18.0974	15.3629	20.9484		5.32994	3.98811	6.6445
25-29			24.738	22.1649	27.391		8.86686	7.29711	10.4052
30-34			29.213	26.6833	31.6599		12.6015	10.7725	14.5924
35-39			33.669	30.7982	36.3778		16.5216	13.8916	19.2571
40-44			36.2138	32.4727	39.8609		20.5646	16.4183	24.4301
45-49			36.9922	32.2344	42.0983		23.9614	18.3198	29.2393
50-54			36.6749	30.6217	43.4909		26.031	18.0883	33.2636
55-59			35.7468	28.7416	44.423		25.8458	15.5379	34.8285
60-64			34.868	27.3149	44.4661		24.1131	12.3302	33.5351
65-69			33.7567	26.2279	43.0519		20.1104	8.11775	29.9775
20-24	2040		19.0023	16.131	21.9958		5.59643	4.18752	6.97673
25-29			26.3997	23.611	29.3209		10.0195	8.20667	11.7926
30-34			30.2949	27.6301	32.9043		14.4405	12.276	16.8208
35-39			34.0804	31.191	36.8693		18.5384	15.7025	21.588
40-44			36.2389	32.5172	39.9311		22.3671	18.0362	26.4197
45-49			36.9722	32.1591	42.0414		25.4335	19.1654	31.1223
50-54			36.7042	30.6849	43.638		27.5091	18.7516	35.0156
55-59			35.84	28.789	44.767		28.2251	17.2013	37.4527
60-64			35.247	27.7721	45.1981		26.5906	13.6677	36.9463
65-69			34.6833	27.2814	44.5659		23.084	9.28676	33.8257

## Sheet: Men Forecast Rural 
Age	Year	Status	Proportion	Proportion	Proportion		Proportion	Proportion	Proportion
20-24	2010	Overweight	5.10212	3.8876	6.30346	Obese	0.766904	0.404446	1.13753
25-29			9.16041	7.04452	11.3197		1.35079	0.737396	1.93197
30-34			11.6848	9.11868	14.2981		1.5967	1.06627	2.16813
35-39			12.7249	10.259	15.2421		2.35085	1.50661	3.21733
40-44			13.1289	10.3603	16.0257		2.13573	1.38371	2.90833
45-49			13.2395	10.3815	16.5289		2.39316	1.61408	3.16659
50-54			8.60728	7.00686	10.3677		2.46441	1.48328	3.5033
55-59			5.12965	3.78684	6.44117		0.542217	0.0790975	0.980089
60-64			4.13481	2.9193	5.41662		0.908653	0.314953	1.48796
65-69			4.82388	3.39553	6.19976		0.998783	0.285724	1.72142
20-24	2020		10.6401	8.10731	13.1454		1.48074	0.780905	2.19635
25-29			15.3118	12.3549	18.9204		2.79005	1.40345	4.21061
30-34			18.3191	14.7772	22.4862		3.79731	1.99111	5.83022
35-39			21.1568	16.7996	25.5997		5.12711	2.96833	7.91802
40-44			22.4988	18.0402	27.3571		5.61929	3.34182	8.17796
45-49			22.1307	17.7879	25.8984		5.84786	3.36861	8.64972
50-54			21.518	16.4788	26.0207		4.97599	3.08483	7.62979
55-59			21.5165	16.7891	26.3987		4.36492	2.54054	6.46819
60-64			18.0132	14.1963	21.8318		3.1461	1.59753	5.04827
65-69			14.1578	10.3117	17.3893		1.05497	0.227013	2.05488
20-24	2030		13.4597	10.2557	16.6289		1.87314	0.987845	2.77838
25-29			17.9513	14.4098	22.2592		3.63147	1.83755	5.47514
30-34			21.4949	17.2102	26.596		5.51464	2.89834	8.40769
35-39			24.5455	19.5782	30.2571		7.47177	4.19105	11.2211
40-44			26.3269	20.914	32.3631		8.50381	4.92469	12.7194
45-49			27.0508	20.9172	32.7897		9.35691	5.64759	14.1675
50-54			27.2476	21.071	33.2554		8.95361	5.02935	13.3831
55-59			27.2438	21.6014	32.9748		7.99491	4.17355	12.257
60-64			26.6889	20.3795	32.4976		6.00167	3.13714	9.99084
65-69			25.5731	19.9136	31.0493		4.4269	1.88187	7.29549
20-24	2040		14.1327	10.7685	17.4604		1.96679	1.03724	2.9173
25-29			19.4414	15.5692	24.1313		4.11388	2.08209	6.18691
30-34			23.1087	18.4465	28.6831		6.42675	3.37335	9.74656
35-39			25.9422	20.6614	32.0961		8.624	4.85151	12.9644
40-44			28.1284	22.3207	34.6625		10.4476	6.15666	15.3003
45-49			29.1047	22.99	35.8755		11.6552	6.94668	17.069
50-54			29.6577	23.1449	36.6436		11.646	6.63915	17.379
55-59			30.5852	23.4106	37.4904		11.1833	6.36908	17.2323
60-64			30.8686	23.8119	37.3774		9.22516	4.50936	14.5406
65-69			29.8924	23.7942	36.142		7.00399	2.85868	11.4939

## Sheet: Men Forecast Urban
Age	Year	Status	Proportion	Proportion	Proportion		Proportion	Proportion	Proportion
20-24	2010	Overweight	10.4861	8.76672	12.2076	Obese	1.82801	1.15138	2.58264
25-29			16.9505	14.5787	19.2122		3.1334	2.27151	4.038
30-34			21.7141	18.9048	24.2417		5.00542	3.13259	6.92768
35-39			26.1218	21.9017	30.2143		5.13406	3.82314	6.41603
40-44			27.303	24.1369	30.3165		5.98775	4.9303	7.10687
45-49			28.3347	25.3922	31.2455		6.05311	4.18527	7.86334
50-54			20.0161	16.3944	23.6368		5.84549	3.76849	7.72264
55-59			11.7045	9.09975	14.4547		1.27392	0.231035	2.20901
60-64			9.54524	6.64583	12.5718		2.08687	0.751049	3.40758
65-69			11.0984	7.88993	14.2092		2.35348	0.866565	3.76617
20-24	2020		17.8977	14.9631	20.836		3.86744	2.43592	5.46399
25-29			24.7807	21.5039	27.9529		5.34916	3.42099	7.53659
30-34			30.9765	26.6178	35.5877		6.18679	3.81843	8.67443
35-39			35.6424	30.4633	41.1944		7.5842	4.64023	10.9984
40-44			38.682	33.1248	43.6836		8.9351	4.80411	13.0736
45-49			40.8252	35.2209	47.138		8.37227	4.28758	12.3696
50-54			38.8923	32.9247	46.1488		8.39326	3.97677	12.629
55-59			36.6289	31.0875	42.5798		8.05068	3.29678	12.15
60-64			30.0858	24.1133	35.8607		6.87383	2.89381	11.1242
65-69			23.2326	18.4501	29.0888		2.77033	0.342636	5.16779
20-24	2030		22.6406	18.9283	26.3575		4.89231	3.08144	6.91194
25-29			28.7345	24.7661	32.5929		7.0642	4.48968	9.95224
30-34			33.9958	29.4741	38.9139		8.97072	5.70612	12.5811
35-39			38.0994	32.8336	44.3517		10.4102	6.22221	14.6215
40-44			41.5647	35.468	49.2387		10.874	5.74149	15.8213
45-49			43.7882	36.7909	52.6117		11.3597	4.90884	18.1797
50-54			42.5496	35.3887	50.8048		11.7121	4.00215	19.3271
55-59			40.9455	33.7003	49.7408		10.815	3.43166	18.2679
60-64			37.0711	30.2969	46.0507		10.1397	3.04121	16.5801
65-69			32.7295	26.5485	40.1594		9.06434	2.44858	14.5778
20-24	2040		23.7726	19.8747	27.6754		5.13693	3.23551	7.25754
25-29			31.0425	26.6143	35.2588		8.02583	5.09252	11.329
30-34			36.0679	31.3686	41.2083		10.6073	6.71875	14.8327
35-39			39.406	34.0437	45.8793		12.287	7.45065	17.2544
40-44			41.9895	36.0238	49.8821		13.5803	7.50156	19.3888
45-49			43.9956	37.3012	53.1516		13.9687	6.7216	20.8091
50-54			43.2331	35.8685	53.4964		13.7381	4.99878	21.9287
55-59			41.6874	34.1367	52.2714		13.6305	3.72878	23.1994
60-64			38.456	31.2583	47.9105		13.0656	3.29555	22.4323
65-69			34.467	27.8937	43.0318		11.3972	2.60695	20.0142

## Sheet: Table of Comparison
				Kelly et al (2008)		Kelly et al (2008)		Swain and Chowdhury (2018)		India Markov model
		Measure	Year	%	Burden*	%	Burden*	%	Burden	%	Burden*
	Esimated percentage/burden	Overweight	2030	12.9	133868	27.8	288491	.		26.7	256700
		Obesity	2030	4	41509.4	5	51886.8	.		9.5	91335
		Overweight/Obesity (rural) Women	2035	.	.	.	.	22.5	50018.3	32.2	88257
		Overweight/Obesity (rural) Men	2035	.	.	.	.	20	54371.7	31.7	93855
	Ages covered (years)			20+		20+		15-49 (54) years for women (men)		20-69
	Data Sources used			Regional studies (Reddy et al 2002; Ramachandran et al 2001)		Regional studies (Reddy et al 2002; Ramachandran et al 2001)		NFHS (2014-15) and NNMB (1992-2011)		NFHS 3 (2005-06); NFHS 4 (2015-16); SAGE wave 0 (2002-04); SAGE wave 1 (2007-10); UN World Population Prospects; UN World Urbanization Prospects; SRS abridged lifetables (1997-2013)
	Methodology			Assume Constant Age-specific prevalence and future prevalence driven by demographic compostion and urbanization		Continuation of secular trend of Overweight and Obesity increase		Linear extrapolation of 25-year historical trend in BMI.		Dynamic Markov Simulation Model
	Inputs			Baseline age-specific prevalence; Population projections; Urbanization		Baseline age-specific prevalence; Population projections; Urbanization		BMI		Age-specific prevalence overweight and obesity; Age-specific incidence of overweight and obesity; Age-specific rate of urbanisation; current/forecasted mortality rates; relative risk of dying for people who are overweight or obese compared to those who are not; Age-specific urban and rural population in 2010; Projected population aged 20-24
	Limitations			Very unlikley assumption of a constant age-specific prevalence		Assuming continuation of past increases in age-specific prevalence does not acknowledge that increases in the proportion of a population that are overweight or obese causes a reduction in the proportion at risk of becoming overweight or obese		Assuming continuation of past increases in age-specific prevalence does not acknowledge that increases in the proportion of a population that are overweight or obese causes a reduction in the proportion at risk of becoming overweight or obese
	* For consistency across the different studies, we calculated the burden using the United Nations World Population Prospects (2019) population projections, and United Nations World Urbanization Prospects (2018), and applying the proportions identified in the studies

## Sheet: Forecasts-South Asian Cut-off
Weight	Residence	Year	20-34			35-54			55-69			All			Men
Overweight	Rural	2010	17.0236	14.5992	19.2019	20.0406	17.412	22.7456	7.69466	6.20903	9.14363	16.709	15.0081	18.3304
		2020	27.3644	23.5628	30.9526	32.5349	27.9617	37.6024	22.1035	18.143	26.6753	28.5015	24.6102	32.8952
		2030	30.944	26.5568	35.1014	35.7137	30.234	42.1958	27.8104	22.6332	34.239	32.2178	27.5496	37.8494
		2040	32.6352	28.028	37.1642	36.2947	30.7682	43.0044	28.8286	23.5464	35.4786	33.203	28.3136	39.0758
Obese		2010	3.38118	2.41877	4.34381	6.50759	5.10401	7.81165	2.0796	1.30192	2.85057	4.40074	3.56154	5.17105
		2020	7.15954	5.05007	9.44559	13.6585	10.4388	16.5675	10.6309	7.85466	13.7166	10.543	8.09674	13.1506
		2030	9.45142	6.65066	12.4815	20.2676	14.7245	26.0129	20.6166	15.0239	26.336	16.6041	12.0716	21.435
		2040	10.7852	7.59092	14.2441	24.2845	17.4186	31.3354	26.6234	19.1657	33.8555	20.7638	14.9059	26.8378
Overweight	Urban	2010	27.6465	25.4281	29.8178	32.9213	30.6673	35.5656	17.5137	13.588	21.4417	28.132	26.7721	29.932
		2020	35.7448	32.1378	39.4347	35.6529	30.816	41.3425	22.3554	16.9383	29.0298	33.2785	29.1797	38.1791
		2030	40.6864	36.7739	44.6861	34.6895	30.0273	40.7321	21.6945	17.3161	28.3777	34.2021	30.1118	39.2867
		2040	42.973	38.9282	47.0566	33.8583	29.2484	39.9891	21.2172	17.1496	27.5425	33.9058	29.8721	38.9394
Obese		2010	7.69754	6.18885	9.1458	15.7176	13.3859	18.1412	4.85912	2.73146	6.73334	10.4451	9.0582	11.6548
		2020	10.344	8.18268	12.611	27.596	22.2984	32.6402	28.7853	22.0599	35.5199	20.9233	17.0327	24.8761
		2030	13.0354	10.3037	15.8701	32.4445	25.9788	39.0891	43.6508	34.0998	51.9089	27.7383	22.343	33.1582
		2040	14.7807	11.7174	17.9931	35.542	28.5612	42.4262	47.7394	37.2064	56.6958	31.4716	25.4718	37.4269
															Women
Weight	Residence	Year	20-34			35-54			55-69			All
Overweight	Rural	2010	14.4404	13.0849	16.3535	21.0839	19.4527	22.8577	10.4784	9.10115	12.1032	16.4684	15.5247	17.6423
		2020	23.4257	20.7722	26.4007	29.4066	25.9484	33.355	23.4546	20.258	27.1566	26.0026	23.1801	29.0071
		2030	26.7134	23.6072	30.1625	32.0996	27.5667	36.8115	27.39	22.9029	32.5014	29.3025	25.648	33.0258
		2040	28.144	24.7493	31.6934	32.8471	28.3411	37.5213	28.1598	23.4581	33.4333	30.293	26.4733	34.2778
Obese		2010	4.0879	3.21237	5.15878	9.2823	7.75738	10.9267	6.07699	4.98211	7.28463	6.46818	5.61102	7.22262
		2020	7.90288	6.27499	9.05365	14.8142	12.8146	17.9858	14.2051	11.9316	16.5063	12.037	10.2592	13.3901
		2030	10.6583	8.41768	12.3914	20.2652	17.4684	23.4977	22.2579	17.4673	26.667	17.4825	14.694	19.6039
		2040	11.9848	9.45602	14.0009	24.4346	20.761	27.6633	26.2634	21.0526	32.2619	21.3505	17.9283	24.0874
Overweight	Urban	2010	25.259	23.9607	26.7452	34.3475	32.92	36.2071	24.2092	21.5625	27.9778	28.7157	27.8079	30.2796
		2020	29.141	26.1109	31.4577	32.9344	28.7117	36.6732	25.3537	19.0745	31.3961	29.9018	25.9126	33.6148
		2030	33.6681	30.1996	36.3206	33.2132	28.8992	37.1535	24.9856	19.2611	31.5654	31.6133	27.3593	35.6842
		2040	35.6222	31.9663	38.4481	33.597	29.3049	37.6056	24.8559	19.2886	31.4533	32.1099	27.7318	36.376
Obese		2010	12.114	10.8319	13.5926	25.1309	23.1484	26.9511	14.0494	11.2631	16.3063	17.6371	16.3235	18.5889
		2020	15.509	13.4442	17.5083	32.1599	29.6959	36.1467	39.165	33.4965	44.0225	26.7128	24.2868	29.9971
		2030	19.8605	17.1056	22.4654	34.544	31.5266	38.891	48.7907	42.7628	55.7956	32.1816	29.3475	36.3689
		2040	22.2561	19.1271	25.2241	37.2951	34.0784	41.9491	50.6436	44.1534	57.946	35.5695	32.4945	40.2458
